# Supplementary material for: Experimental and computational studies of the optical properties of 2,5,8-tris(phenylthiolato)heptazine with an inverted singlet–triplet gap
Source: Royal Society of Chemistry journal article supplement (doi:10.1039/d3cp05242g), 2024-01-01
Supplement: d3cp05242g1.pdf [file d3cp05242g1.pdf]

# ELECTRONIC SUPPLEMENTARY INFORMATION

Experimental and computational studies of the optical properties of 2,5,8-tris(phenylthiolato)heptazine with an inverted singlet-triplet gap

Daniel Blasco,<sup>\*a</sup> Rinat T. Nasibullin,<sup>b</sup> Rashid R. Valiev,<sup>b</sup> Miguel Monge,<sup>a</sup>  
José M. López-de-Luzuriaga,<sup>a</sup> and Dage Sundholm<sup>\*b</sup>

<sup>a</sup> Departamento de Química, Instituto de Investigación en Química (IQUR), Universidad de La Rioja, Madre de Dios 53, 26006, Logroño, Spain.

<sup>b</sup> Department of Chemistry, Faculty of Science, University of Helsinki, P.O. Box 55 (A.I. Virtasen aukio 1), FIN-00014, Helsinki, Finland.

Table S1: Selected bond lengths (in Å) and angles (in °) of molecules **1-4**.

|                   |                | X-ray structure              | Computational model |
|-------------------|----------------|------------------------------|---------------------|
| Molecule <b>1</b> | S-C(Hz)        | 1.742(3)                     | 1.74                |
|                   | S-C(Ph)        | 1.755(3)                     | 1.77                |
|                   | C(Hz)-S-C(Ph)  | 103.43(17)                   | 102.4               |
|                   | S-C(Hz)-N(Hz)  | 119.(2), 111.3(2)            | 119.5, 112.4        |
| Molecule <b>2</b> | O-C(Hz)        | 1.345(7), 1.335(8), 1.321(7) | 1.33                |
|                   | O-C(Ph)        | 1.414(8), 1.412(8), 1.406(8) | 1.39                |
|                   | C(Hz)-O-C(Ph)  | 120.0(7), 119.4(7), 118.8(7) | 119.2               |
|                   | O-C(Hz)-N(Hz)  | 119.7(9)-110.4(10)           | 118.3, 113.2        |
| Molecule <b>3</b> | Se-C(Hz)       | 1.891(5)                     | 1.89                |
|                   | Se-C(Ph)       | 1.895(4)                     | 1.91                |
|                   | C(Hz)-Se-C(Ph) | 99.1(2)                      | 99.4                |
|                   | Se-C(Hz)-N(Hz) | 118.8(4), 111.3(2)           | 119.1, 112.6        |
| Molecule <b>4</b> | Te-C(Hz)       | -                            | 2.09                |
|                   | Te-C(Ph)       | -                            | 2.10                |
|                   | C(Hz)-Te-C(Ph) | -                            | 97.5                |
|                   | Te-C(Hz)-N(Hz) | -                            | 119.3, 112.7        |

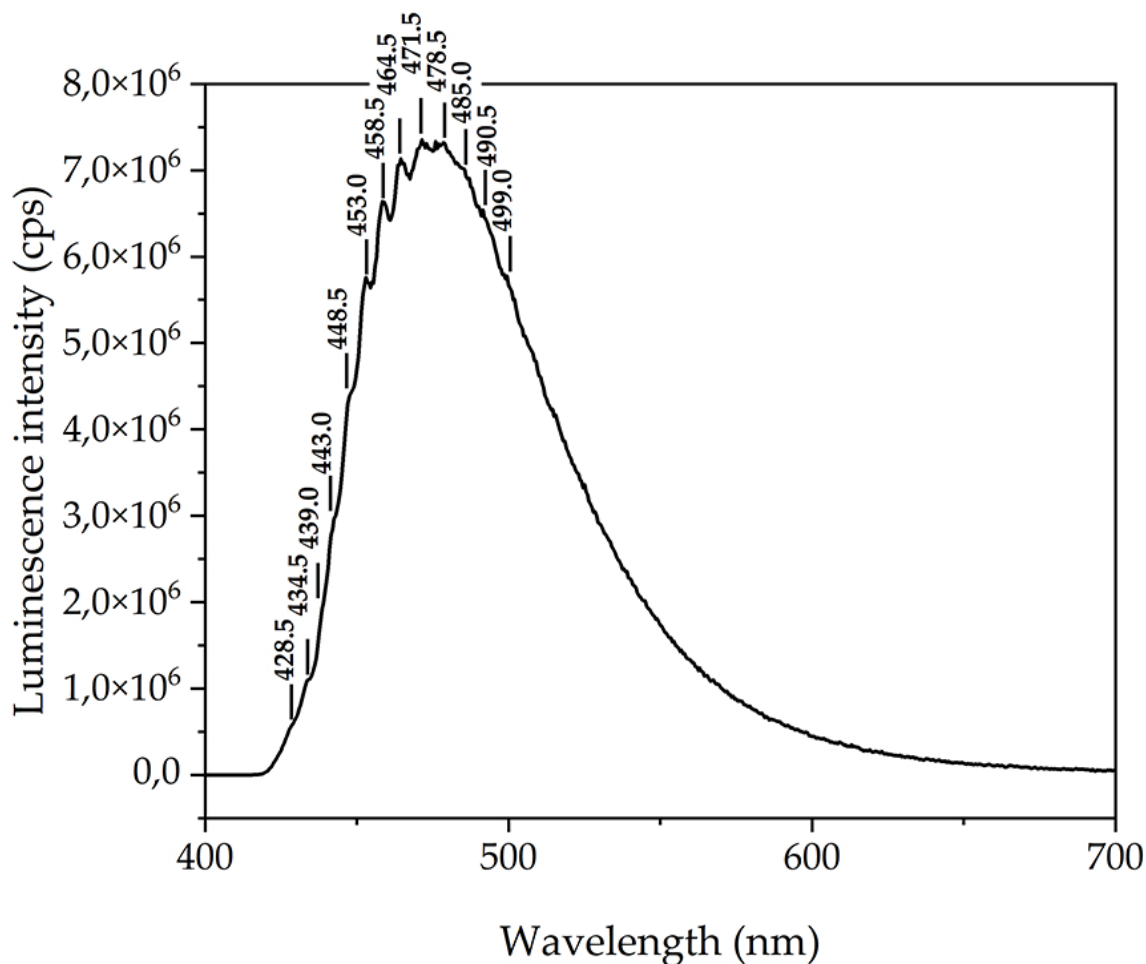

Figure S1: Emission spectrum of molecule **1** in the solid state at 78 K ( $\lambda_{\text{ex}}$  of 375 nm) revealing the vibronic profile of the ground state (in nm).

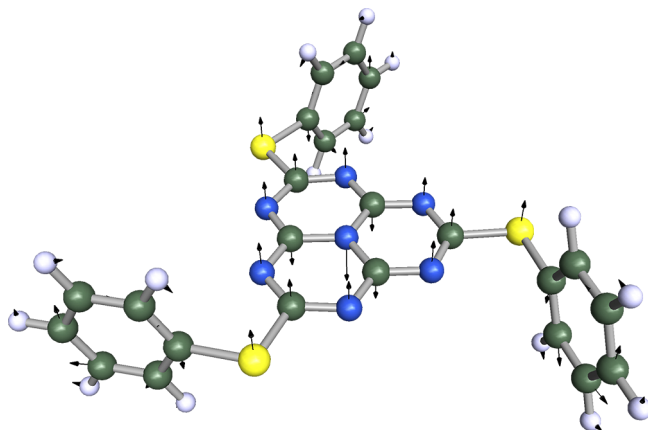

Figure S2: Atomic displacements (black arrows) of the symmetric out-of-plane vibrational mode ( $\tilde{\nu}$  of 266.11  $\text{cm}^{-1}$ ) of molecule **1**.

Table S2: The fitting parameters  $A$ ,  $B_i$  and  $\tau_i$  (in s) of the transient photoluminescence decay data of molecule **1** in the solid state at different temperatures (in K).

| Temperature | $A$      | $B_1$    | $\tau_1$ | $B_2$    | $\tau_2$ | $B_3$    | $\tau_3$ | $\chi^2$ | $\langle\tau\rangle_{\text{amp}}$ |
|-------------|----------|----------|----------|----------|----------|----------|----------|----------|-----------------------------------|
| 300         | 2.668E+0 | 2.726E+3 | 3.703E-8 | 6.537E+3 | 1.971E-7 | 7.429E+2 | 4.301E-7 | 1.236    | 1.708E-7                          |
| 280         | 2.357E+0 | 2.417E+3 | 5.898E-8 | 4.500E+3 | 2.279E-7 | 3.070E+2 | 5.453E-7 | 1.123    | 1.848E-7                          |
| 260         | 4.936E+0 | 3.944E+3 | 6.666E-8 | 5.654E+3 | 2.481E-7 | 4.378E+2 | 5.997E-7 | 1.189    | 1.921E-7                          |
| 240         | 3.939E+0 | 4.738E+3 | 9.879E-8 | 4.835E+3 | 2.955E-7 | 2.136E+2 | 9.371E-7 | 1.171    | 2.143E-7                          |
| 220         | 3.851E+0 | 4.607E+3 | 2.049E-7 | 4.020E+2 | 7.584E-7 | -        | -        | 1.455    | 2.493E-7                          |
| 200         | 5.403E+0 | 5.101E+3 | 2.406E-7 | 1.892E+2 | 1.087E-6 | -        | -        | 1.459    | 2.708E-7                          |
| 180         | 5.726E+0 | 5.248E+3 | 2.809E-7 | 1.019E+2 | 1.263E-6 | -        | -        | 1.308    | 2.996E-7                          |
| 160         | 1.213E+1 | 6.419E+3 | 2.719E-7 | 1.834E+3 | 4.895E-7 | -        | -        | 1.148    | 3.203E-7                          |
| 140         | 8.413E+0 | 2.832E+3 | 2.664E-7 | 2.575E+3 | 4.486E-7 | -        | -        | 1.112    | 3.532E-7                          |
| 120         | 1.014E+1 | 2.849E+3 | 2.625E-7 | 5.740E+3 | 4.461E-7 | -        | -        | 1.174    | 3.852E-7                          |
| 100         | 6.378E+0 | 1.504E+3 | 2.549E-7 | 4.800E+3 | 4.656E-7 | -        | -        | 1.036    | 4.153E-7                          |
| 78          | 5.011E+0 | 7.291E+3 | 3.973E-7 | 2.468E+3 | 5.849E-7 | -        | -        | 1.115    | 4.447E-7                          |

Table S3: The fitting parameters  $A$ ,  $B$  and  $\tau$  (in s) of the transient photoluminescence decay data of molecule **1** in toluene solution in the absence and presence of oxygen.

| Temperature              | $A$      | $B$      | $\chi^2$ | $\tau$   |
|--------------------------|----------|----------|----------|----------|
| O <sub>2</sub> free      | 3.199E+1 | 4.997E+2 | 1.087    | 4.620E-7 |
| O <sub>2</sub> saturated | 1.985E+1 | 2.544E+2 | 1.104    | 3.163E-7 |

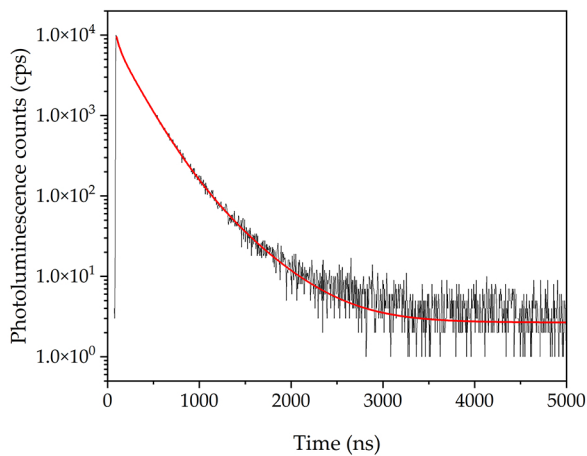

$T = 300 \text{ K}, \langle \tau \rangle_{\text{amp}} = 171 \text{ ns}, \chi^2 = 1.24$

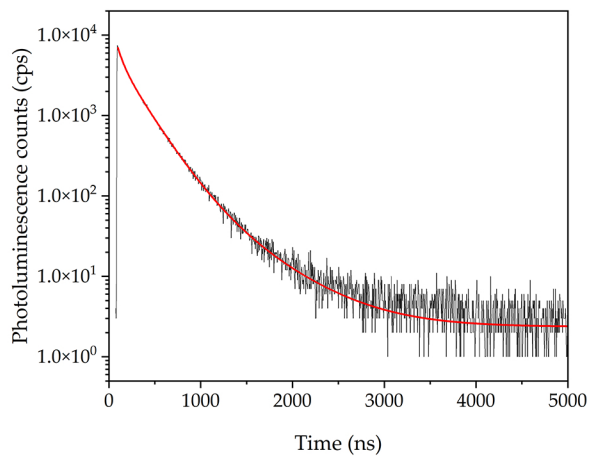

$T = 280 \text{ K}, \langle \tau \rangle_{\text{amp}} = 185 \text{ ns}, \chi^2 = 1.12$

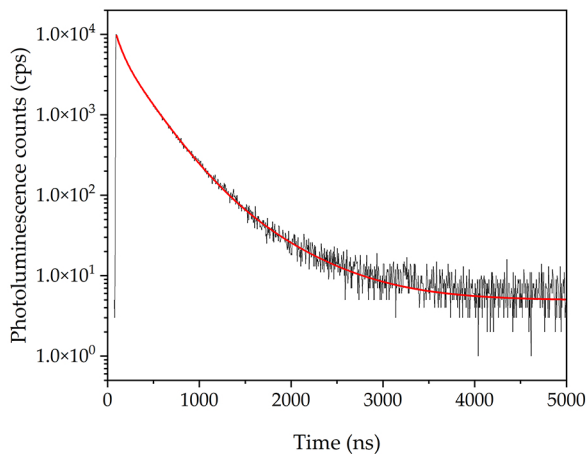

$T = 260 \text{ K}, \langle \tau \rangle_{\text{amp}} = 192 \text{ ns}, \chi^2 = 1.19$

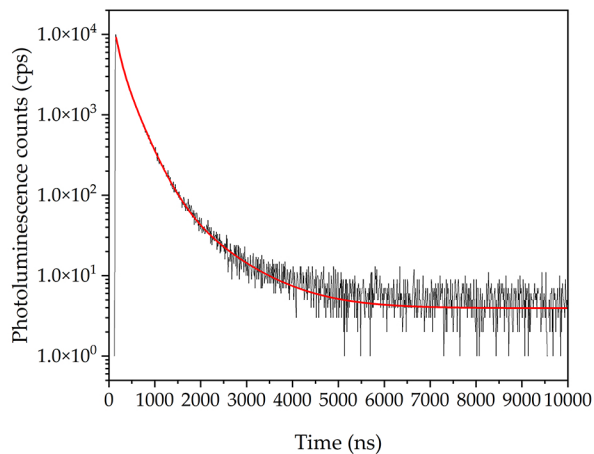

$T = 240 \text{ K}, \langle \tau \rangle_{\text{amp}} = 214 \text{ ns}, \chi^2 = 1.17$

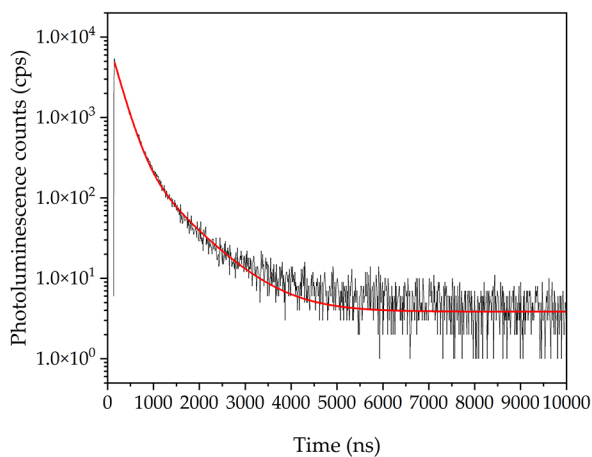

$T = 220 \text{ K}, \langle \tau \rangle_{\text{amp}} = 249 \text{ ns}, \chi^2 = 1.46$

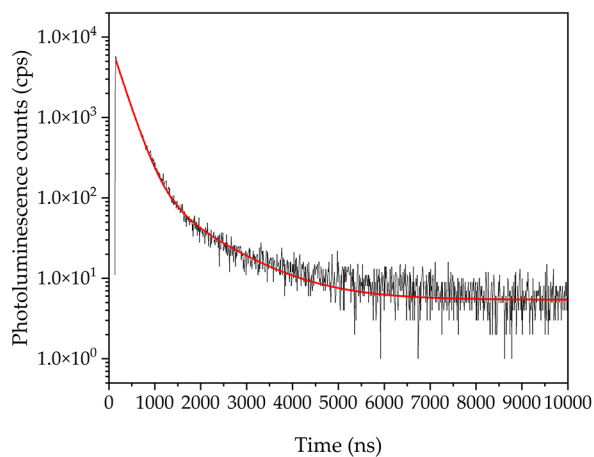

$T = 200 \text{ K}, \langle \tau \rangle_{\text{amp}} = 271 \text{ ns}, \chi^2 = 1.46$

Figure S3: Transient photoluminescence decay data of molecule **1** in the solid state.



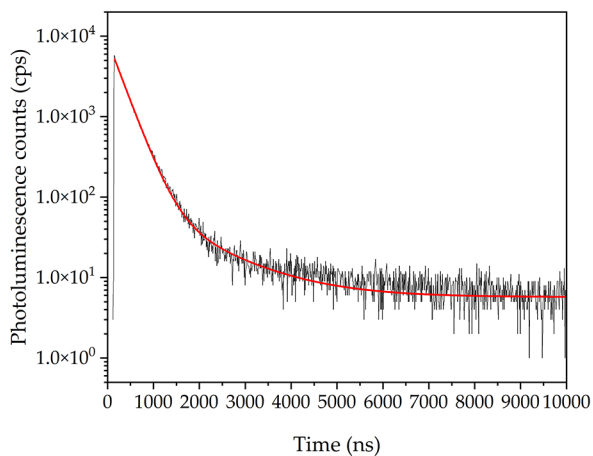

$T = 180 \text{ K}, \langle \tau \rangle_{\text{amp}} = 300 \text{ ns}, \chi^2 = 1.31$

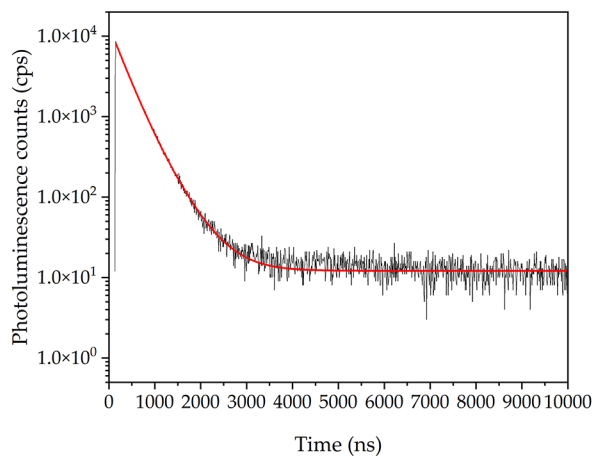

$T = 160 \text{ K}, \langle \tau \rangle_{\text{amp}} = 320 \text{ ns}, \chi^2 = 1.15$

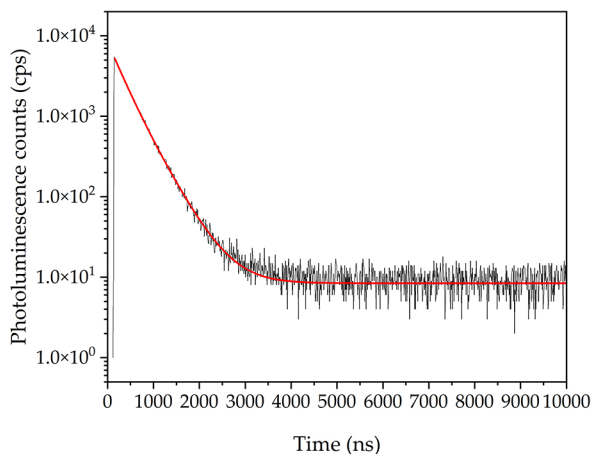

$T = 140 \text{ K}, \langle \tau \rangle_{\text{amp}} = 353 \text{ ns}, \chi^2 = 1.11$

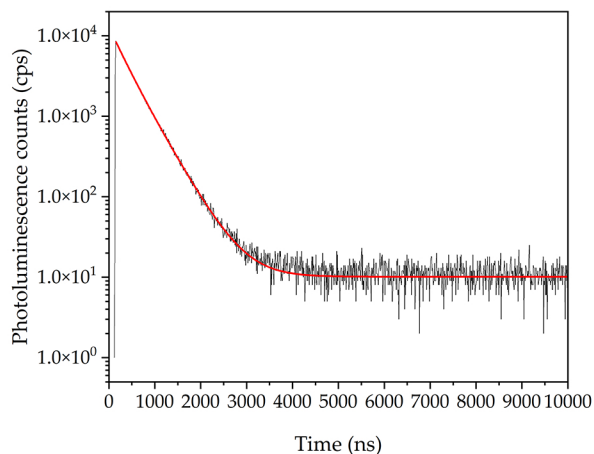

$T = 120 \text{ K}, \langle \tau \rangle_{\text{amp}} = 385 \text{ ns}, \chi^2 = 1.17$

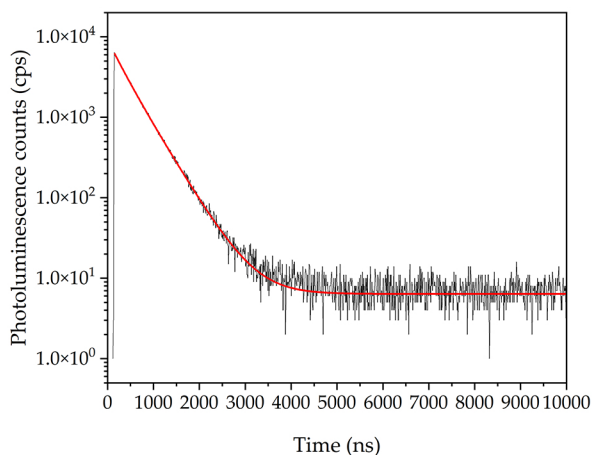

$T = 100 \text{ K}, \langle \tau \rangle_{\text{amp}} = 415 \text{ ns}, \chi^2 = 1.04$

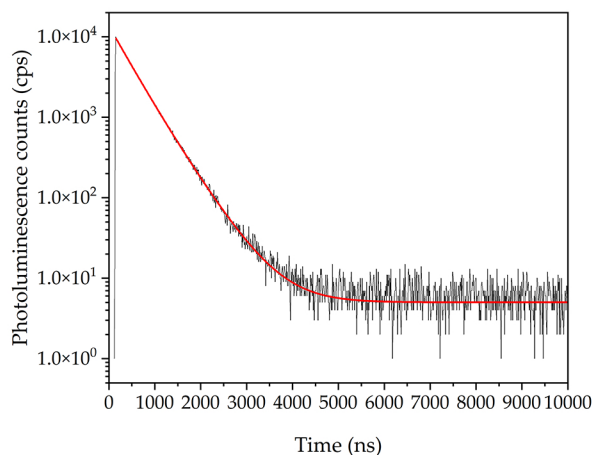

$T = 78 \text{ K}, \langle \tau \rangle_{\text{amp}} = 445 \text{ ns}, \chi^2 = 1.12$

Figure S4: Transient photoluminescence decay data of molecule **1** in the solid state (continuation).

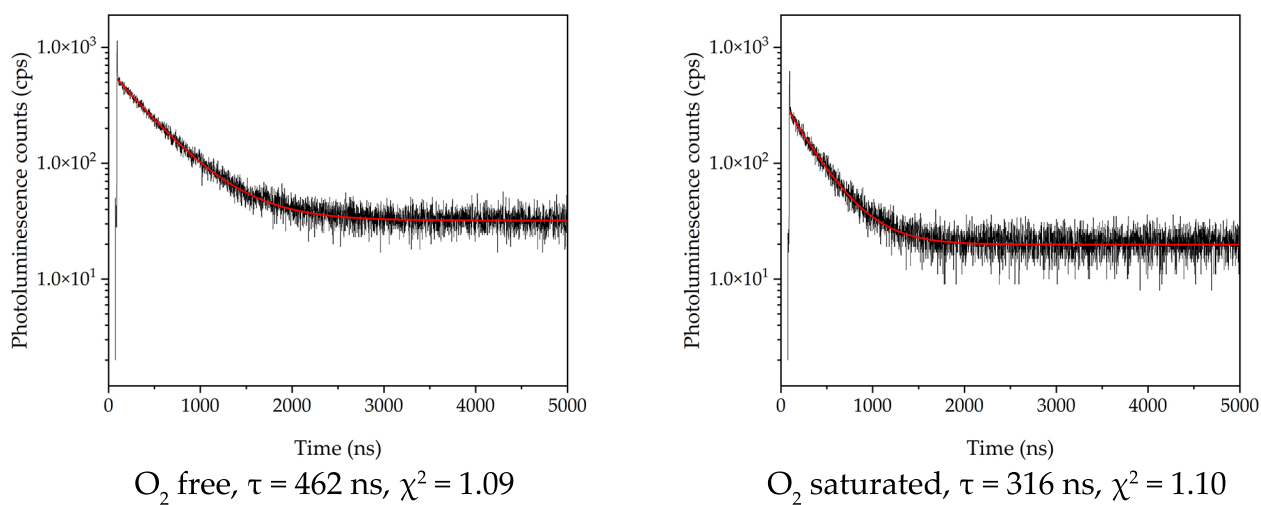

Figure S5: Transient photoluminescence decay data of molecule **1** in toluene solution.

$S_1 \leftarrow S_0$  (361 nm)

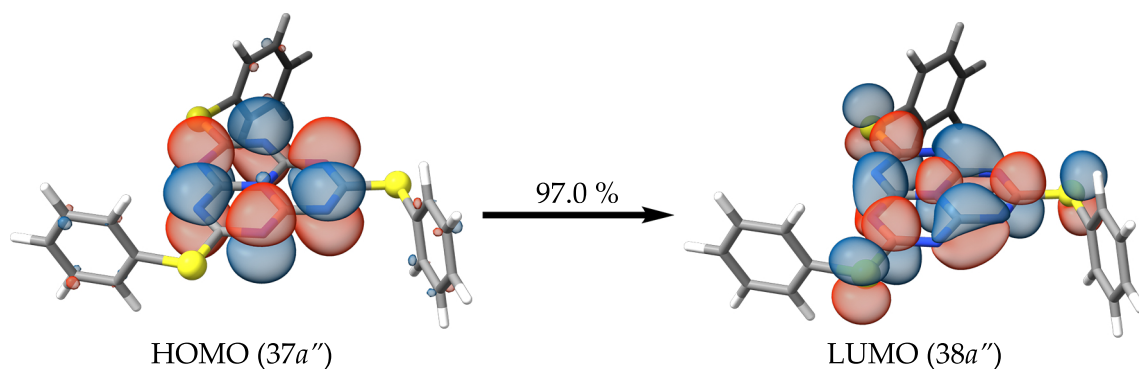

Figure S6: Molecular orbitals of the  $S_1$  transition at the TD-DFT/PBE0/def2-TZVP level of theory of molecule **1**.

$S_6 \leftarrow S_0$  (289 nm)

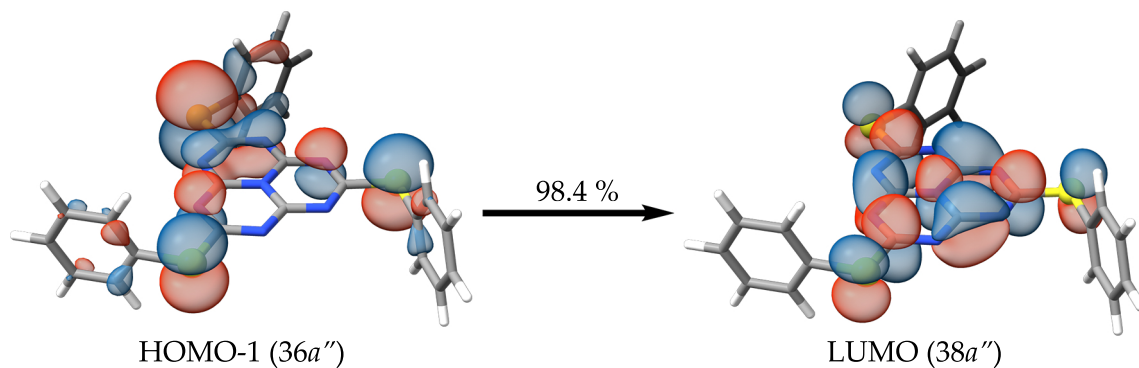

Figure S7: Molecular orbitals of the  $S_6$  transition at the TD-DFT/PBE0/def2-TZVP level of theory of molecule **1**.

$S_7 \leftarrow S_0$  (289 nm)

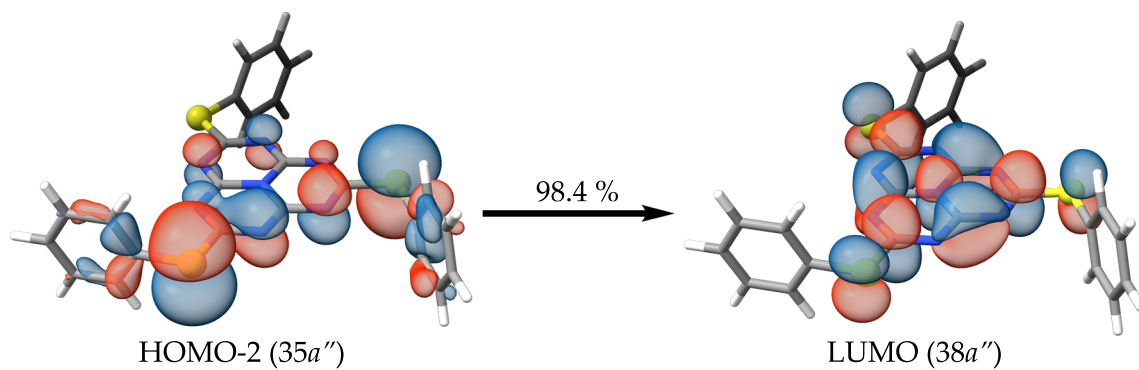

Figure S8: Molecular orbitals of the  $S_7$  transition at the TD-DFT/PBE0/def2-TZVP level of theory of molecule **1**.

$S_{26} \leftarrow S_0$  (241 nm)

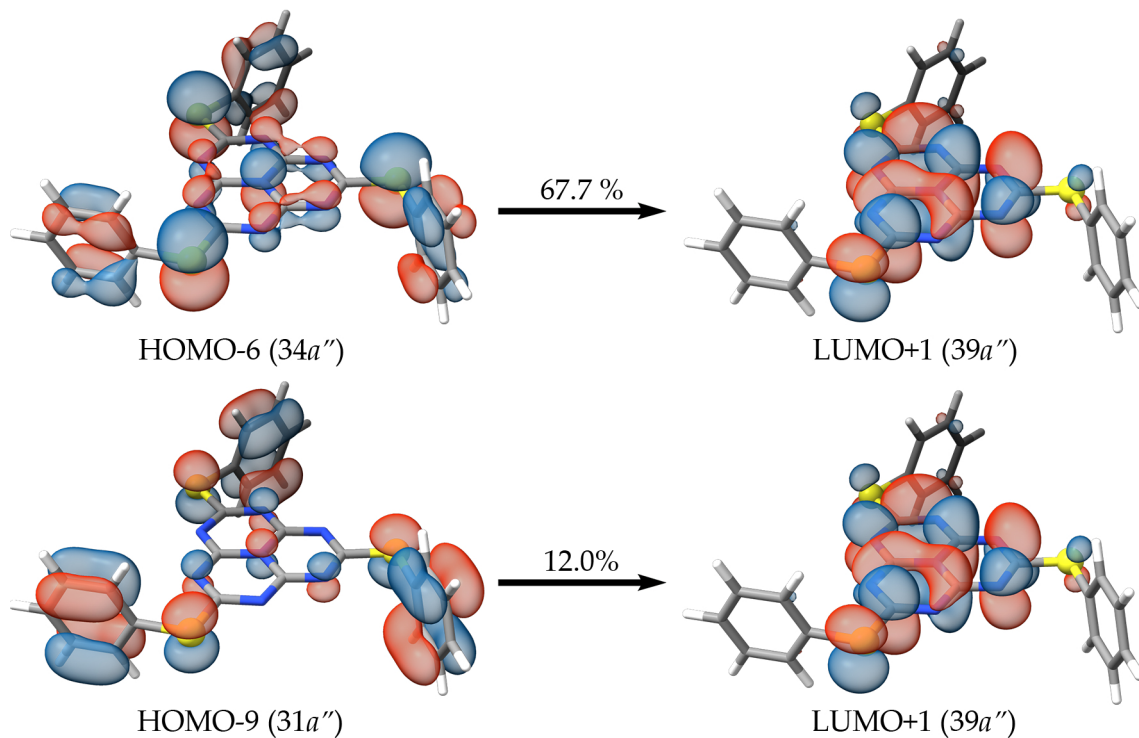

Figure S9: Molecular orbitals of the  $S_{26}$  transition at the TD-DFT/PBE0/def2-TZVP level of theory of molecule **1**.

$S_{27} \leftarrow S_0$  (241 nm)

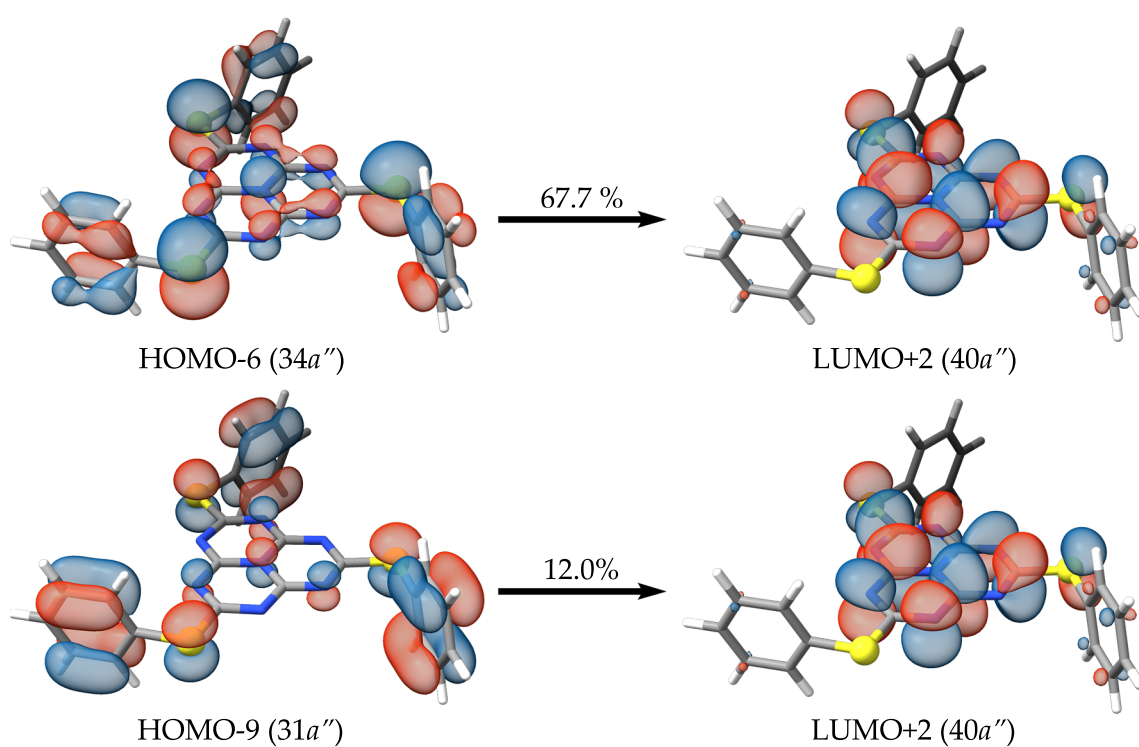

Figure S10: Molecular orbitals of the  $S_{27}$  transition at the TD-DFT/PBE0/def2-TZVP level of theory of molecule **1**.

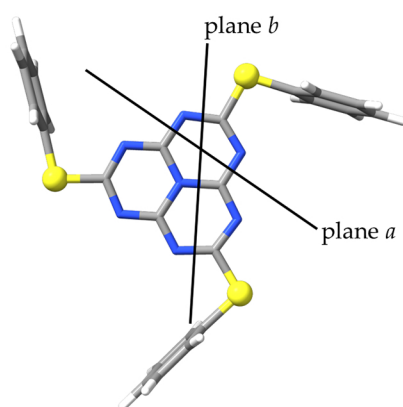

plane *a*

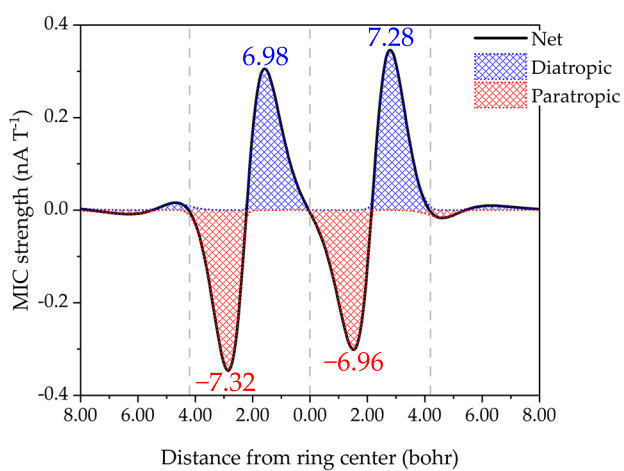

plane *b*

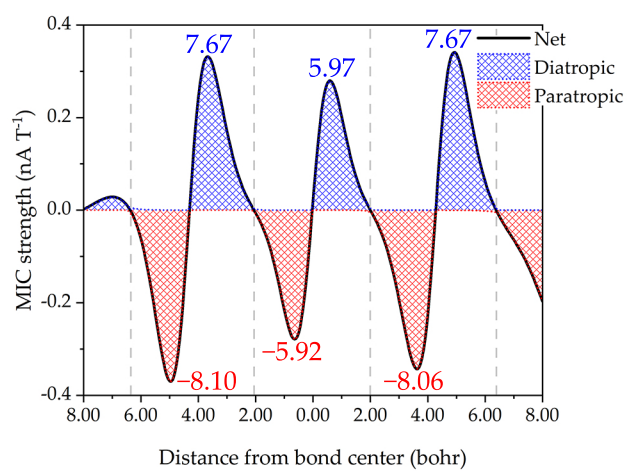

Figure S11: (Top) Selected cut planes. (Bottom) The net (black), diatropic (blue), and paratropic (red) MIC density profile along the selected cut planes. The vertical dashed grey lines indicate numerical integration limits.

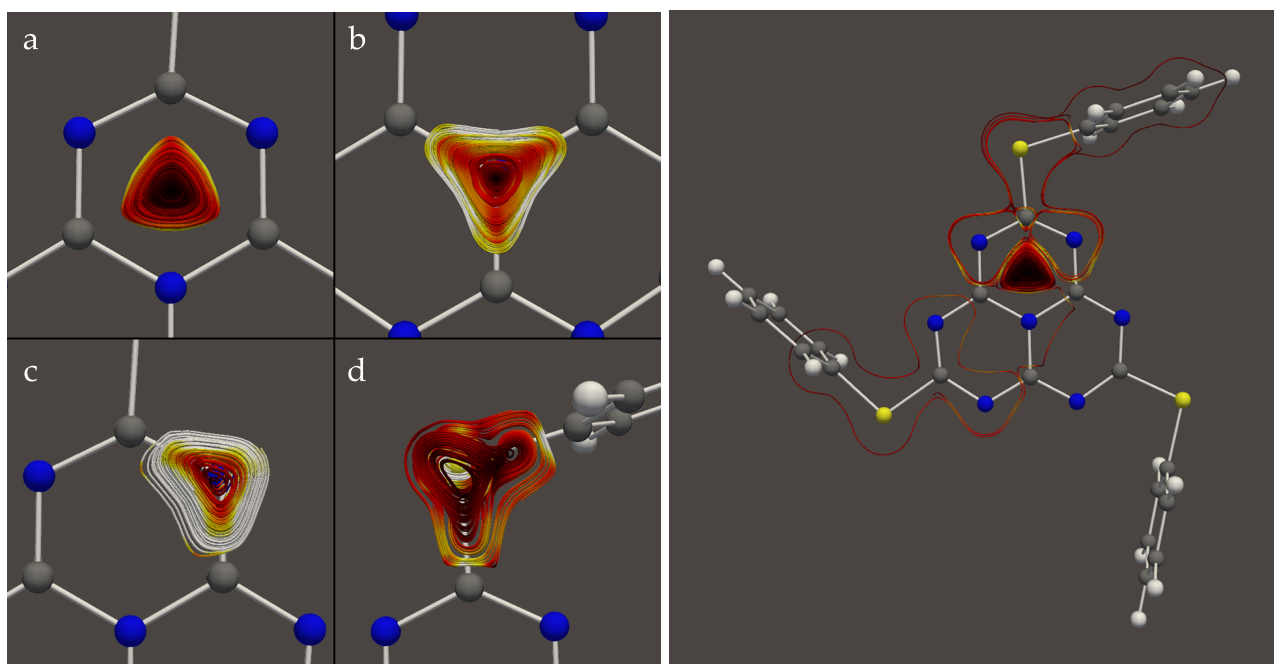

Figure S12: (Left) Streamline representations of the MIC density at (a) the center of a triazine ring, (b) the central nitrogen atom, (c) a peripheral nitrogen atom, and (d) a sulfur atom of molecule **1**. (Right) Electron delocalization pathways of molecule **1**. The MIC strength increases in the order black-red-orange-yellow-white.

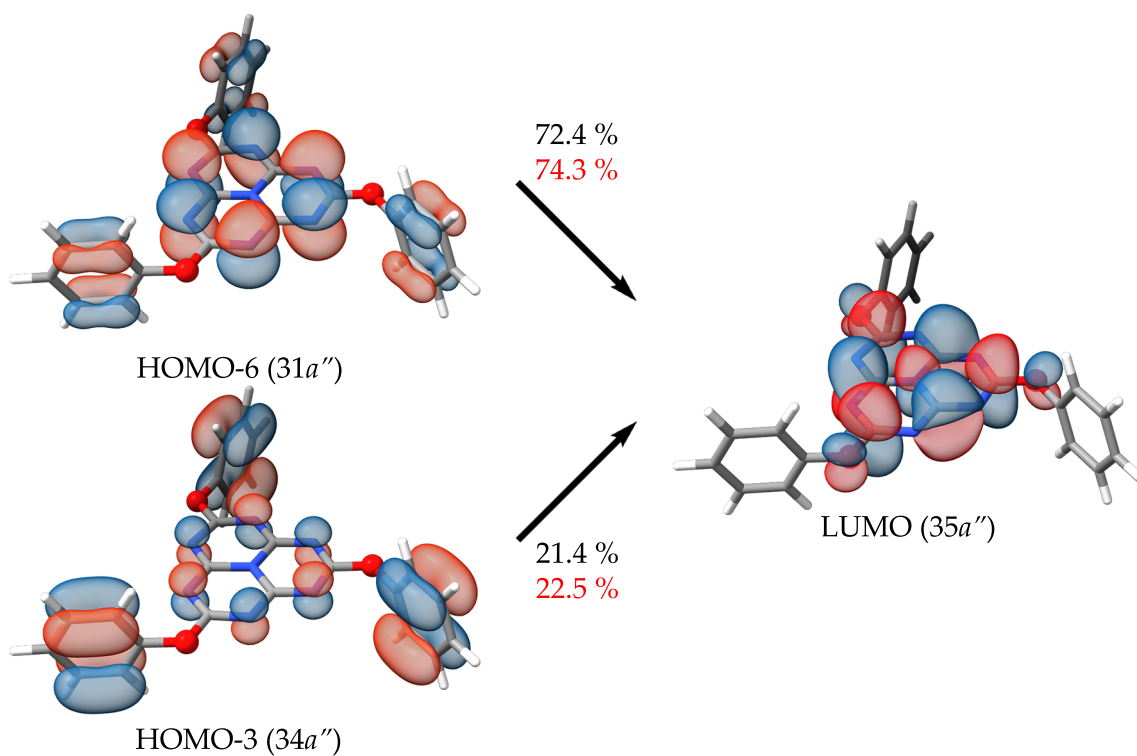

Figure S13: Molecular orbitals and their contribution to the  $S_1$  ( $T_1$  in red) transition at the ADC(2)/def2-TZVP level of theory of molecule **2**.



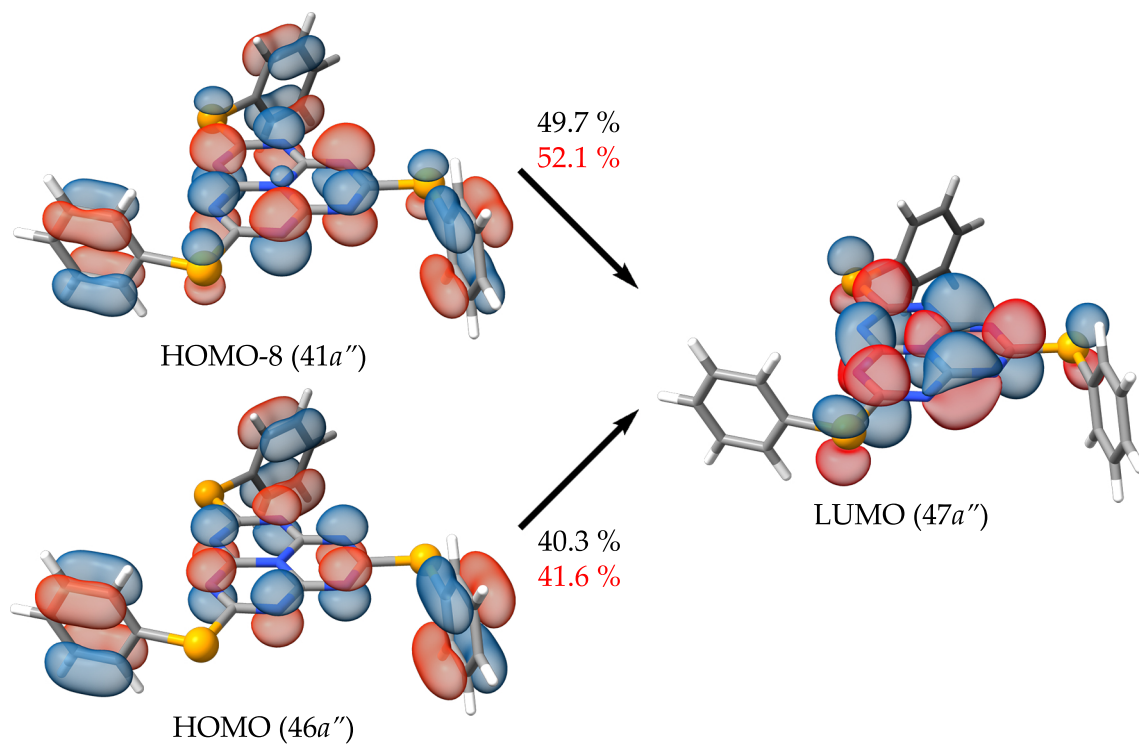

Figure S14: Molecular orbitals and their contribution to the  $S_1$  ( $T_1$  in red) transition at the ADC(2)/def2-TZVP level of theory of molecule **3**.

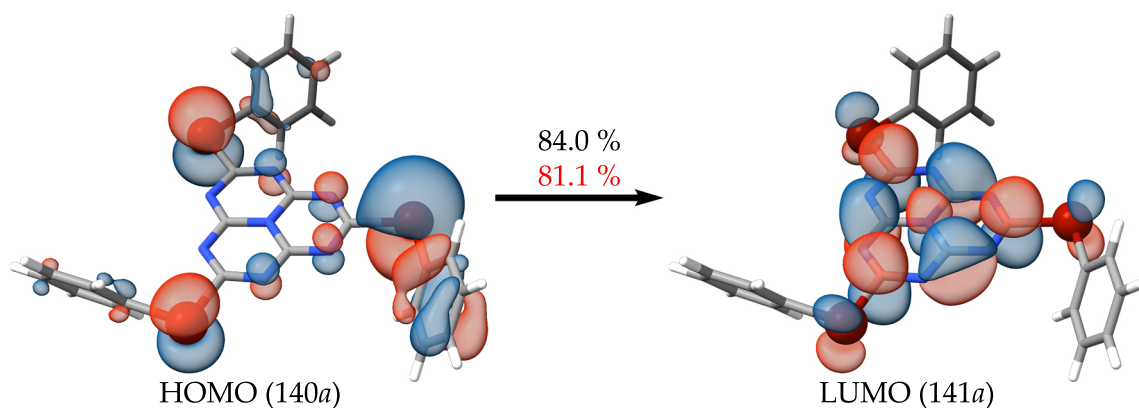

Figure S15: Molecular orbitals and their contribution to the  $S_1$  ( $T_1$  in red) transition at the ADC(2)/def2-TZVP level of theory of molecule **4**.

## Cartesian coordinates of molecule 1 (S<sub>0</sub> geometry).

|   |            |            |            |
|---|------------|------------|------------|
| C | 1.0779213  | 0.8881808  | 0.0000000  |
| C | -0.4263747 | 2.5654747  | 0.0000000  |
| C | -1.3081478 | 0.4894168  | 0.0000000  |
| C | -2.0085789 | -1.6519887 | 0.0000000  |
| C | 0.2302265  | -1.3775976 | 0.0000000  |
| C | 2.4349536  | -0.9134860 | 0.0000000  |
| N | -1.5115247 | 1.7915535  | 0.0000000  |
| N | 0.8420768  | 2.1914415  | 0.0000000  |
| N | -2.3188825 | -0.3664608 | 0.0000000  |
| N | -0.7957685 | -2.2047956 | 0.0000000  |
| N | 1.4768056  | -1.8249807 | 0.0000000  |
| N | 2.3072932  | 0.4132420  | 0.0000000  |
| N | 0.0000000  | 0.0000000  | 0.0000000  |
| S | -0.8216102 | 4.2621921  | 0.0000000  |
| S | 4.1019717  | -1.4195608 | 0.0000000  |
| S | -3.2803615 | -2.8426313 | 0.0000000  |
| C | 0.7732184  | 5.0237814  | 0.0000000  |
| C | 1.3848354  | 5.3439403  | -1.2052049 |
| C | 1.3848354  | 5.3439403  | 1.2052049  |
| C | 2.6195910  | 5.9723011  | -1.2020348 |
| H | 0.8951387  | 5.0921781  | -2.1379346 |
| C | 2.6195910  | 5.9723011  | 1.2020348  |
| H | 0.8951387  | 5.0921781  | 2.1379346  |
| C | 3.2372399  | 6.2851398  | 0.0000000  |
| H | 3.1012326  | 6.2160553  | -2.1415548 |
| H | 3.1012326  | 6.2160553  | 2.1415548  |
| H | 4.2036529  | 6.7755310  | 0.0000000  |
| C | 3.9641131  | -3.1815175 | 0.0000000  |
| C | 3.9355703  | -3.8712728 | 1.2052049  |
| C | 3.9355703  | -3.8712728 | -1.2052049 |
| C | 3.8623689  | -5.2547829 | 1.2020348  |
| H | 3.9623862  | -3.3213019 | 2.1379346  |
| C | 3.8623689  | -5.2547829 | -1.2020348 |
| H | 3.9623862  | -3.3213019 | -2.1379346 |
| C | 3.8244708  | -5.9461019 | 0.0000000  |
| H | 3.8326455  | -5.7937739 | 2.1415548  |
| H | 3.8326455  | -5.7937739 | -2.1415548 |
| H | 3.7659556  | -7.0282357 | 0.0000000  |
| C | -4.7373315 | -1.8422639 | 0.0000000  |
| C | -5.3204057 | -1.4726675 | 1.2052049  |
| C | -5.3204057 | -1.4726675 | -1.2052049 |
| C | -6.4819599 | -0.7175182 | 1.2020348  |
| H | -4.8575249 | -1.7708762 | 2.1379346  |
| C | -6.4819599 | -0.7175182 | -1.2020348 |
| H | -4.8575249 | -1.7708762 | -2.1379346 |
| C | -7.0617107 | -0.3390379 | 0.0000000  |
| H | -6.9338782 | -0.4222814 | 2.1415548  |
| H | -6.9338782 | -0.4222814 | -2.1415548 |
| H | -7.9696085 | 0.2527047  | 0.0000000  |



## Cartesian coordinates of molecule 1 (S<sub>1</sub> geometry).

|   |            |            |            |
|---|------------|------------|------------|
| C | 1.1906537  | 0.7166684  | 0.2937449  |
| C | -0.0434568 | 2.6187389  | 0.3060107  |
| C | -1.2159799 | 0.6728021  | 0.2937449  |
| C | -2.2461660 | -1.3470042 | 0.3060107  |
| C | 0.0253262  | -1.3894706 | 0.2937449  |
| C | 2.2896228  | -1.2717347 | 0.3060107  |
| N | -1.2176891 | 1.9835783  | 0.4160277  |
| N | 1.1501957  | 2.0268575  | 0.4053269  |
| N | -2.3304079 | -0.0173301 | 0.4053269  |
| N | -1.1089847 | -2.0463389 | 0.4160277  |
| N | 1.1802122  | -2.0095274 | 0.4053269  |
| N | 2.3266738  | 0.0627605  | 0.4160277  |
| N | -0.0000000 | 0.0000000  | -0.0008556 |
| S | -0.1855240 | 4.3524692  | 0.1994066  |
| S | 3.8621109  | -2.0155661 | 0.1994066  |
| S | -3.6765869 | -2.3369031 | 0.1994066  |
| C | 1.4946210  | 4.8689654  | 0.0231541  |
| C | 1.8967878  | 5.4220444  | -1.1863412 |
| C | 2.3840153  | 4.7919390  | 1.0892844  |
| C | 3.1921147  | 5.8966158  | -1.3295781 |
| H | 1.1955069  | 5.4734105  | -2.0104872 |
| C | 3.6789975  | 5.2546052  | 0.9350366  |
| H | 2.0606431  | 4.3606001  | 2.0278408  |
| C | 4.0835530  | 5.8095834  | -0.2718271 |
| H | 3.5049449  | 6.3279316  | -2.2731104 |
| H | 4.3754325  | 5.1845168  | 1.7621267  |
| H | 5.0973993  | 6.1748616  | -0.3863214 |
| C | 3.4693372  | -3.7288624 | 0.0231541  |
| C | 2.9579333  | -4.4605873 | 1.0892844  |
| C | 3.7472343  | -4.3536886 | -1.1863412 |
| C | 2.7111228  | -5.8134079 | 0.9350366  |
| H | 2.7460689  | -3.9648693 | 2.0278408  |
| C | 3.5105617  | -5.7127603 | -1.3295781 |
| H | 4.1423591  | -3.7720446 | -2.0104872 |
| C | 2.9894703  | -6.4412523 | -0.2718271 |
| H | 2.3022070  | -6.3814941 | 1.7621267  |
| H | 3.7276771  | -6.1993371 | -2.2731104 |
| H | 2.7988873  | -7.5019081 | -0.3863214 |
| C | -4.9639582 | -1.1401029 | 0.0231541  |
| C | -5.3419486 | -0.3313517 | 1.0892844  |
| C | -5.6440221 | -1.0683558 | -1.1863412 |
| C | -6.3901203 | 0.5588027  | 0.9350366  |
| H | -4.8067120 | -0.3957307 | 2.0278408  |
| C | -6.7026764 | -0.1838555 | -1.3295781 |
| H | -5.3378659 | -1.7013659 | -2.0104872 |
| C | -7.0730233 | 0.6316690  | -0.2718271 |
| H | -6.6776395 | 1.1969773  | 1.7621267  |
| H | -7.2326220 | -0.1285945 | -2.2731104 |
| H | -7.8962867 | 1.3270465  | -0.3863214 |

## Cartesian coordinates of molecule 1 (T<sub>1</sub> geometry).

|   |            |            |            |
|---|------------|------------|------------|
| C | 1.1998550  | 0.7095530  | 0.2702971  |
| C | -0.0185614 | 2.6192809  | 0.2853263  |
| C | -1.2144185 | 0.6843284  | 0.2702971  |
| C | -2.2590831 | -1.3257151 | 0.2853263  |
| C | 0.0145634  | -1.3938815 | 0.2702971  |
| C | 2.2776445  | -1.2935658 | 0.2853263  |
| N | -1.2035630 | 1.9969520  | 0.3743963  |
| N | 1.1734474  | 2.0210405  | 0.3623513  |
| N | -2.3369962 | 0.0057150  | 0.3623513  |
| N | -1.1276297 | -2.0407921 | 0.3743963  |
| N | 1.1635487  | -2.0267555 | 0.3623513  |
| N | 2.3311926  | 0.0438401  | 0.3743963  |
| N | -0.0000000 | 0.0000000  | 0.0238256  |
| S | -0.1591876 | 4.3565606  | 0.2070907  |
| S | 3.8524860  | -2.0404198 | 0.2070907  |
| S | -3.6932984 | -2.3161408 | 0.2070907  |
| C | 1.5162991  | 4.8846326  | 0.0313082  |
| C | 1.8861130  | 5.5261351  | -1.1447435 |
| C | 2.4333463  | 4.7357951  | 1.0663442  |
| C | 3.1753320  | 6.0176702  | -1.2855948 |
| H | 1.1643893  | 5.6322216  | -1.9457378 |
| C | 3.7222169  | 5.2150793  | 0.9128622  |
| H | 2.1366973  | 4.2367888  | 1.9796354  |
| C | 4.0940773  | 5.8587632  | -0.2601285 |
| H | 3.4621068  | 6.5179245  | -2.2030157 |
| H | 4.4396629  | 5.0888198  | 1.7149596  |
| H | 5.1033887  | 6.2367700  | -0.3732839 |
| C | 3.4720664  | -3.7554698 | 0.0313082  |
| C | 2.8846457  | -4.4752373 | 1.0663442  |
| C | 3.8427169  | -4.3964893 | -1.1447435 |
| C | 2.6552827  | -5.8310740 | 0.9128622  |
| H | 2.6008181  | -3.9688286 | 1.9796354  |
| C | 3.6237893  | -5.7587533 | -1.2855948 |
| H | 4.2954524  | -3.8245015 | -1.9457378 |
| C | 3.0267991  | -6.4749566 | -0.2601285 |
| H | 2.1872157  | -6.3892707 | 1.7149596  |
| H | 3.9136348  | -6.2572347 | -2.2030157 |
| H | 2.8495069  | -7.5380493 | -0.3732839 |
| C | -4.9883654 | -1.1291628 | 0.0313082  |
| C | -5.3179920 | -0.2605579 | 1.0663442  |
| C | -5.7288299 | -1.1296458 | -1.1447435 |
| C | -6.3774996 | 0.6159948  | 0.9128622  |
| H | -4.7375154 | -0.2679603 | 1.9796354  |
| C | -6.7991213 | -0.2589169 | -1.2855948 |
| H | -5.4598417 | -1.8077201 | -1.9457378 |
| C | -7.1208765 | 0.6161934  | -0.2601285 |
| H | -6.6268786 | 1.3004510  | 1.7149596  |
| H | -7.3757416 | -0.2606898 | -2.2030157 |
| H | -7.9528956 | 1.3012793  | -0.3732839 |

## Cartesian coordinates of molecule 2.

|   |            |            |            |
|---|------------|------------|------------|
| C | 1.1757263  | 0.7521365  | 0.0000000  |
| C | -0.1246016 | 2.5891192  | 0.0000000  |
| C | -1.2392325 | 0.6421406  | 0.0000000  |
| C | -2.1799422 | -1.4024678 | 0.0000000  |
| C | 0.0635062  | -1.3942771 | 0.0000000  |
| C | 2.3045438  | -1.1866514 | 0.0000000  |
| N | -1.2922162 | 1.9573636  | 0.0000000  |
| N | 1.0915089  | 2.0729680  | 0.0000000  |
| N | -2.3409974 | -0.0912096 | 0.0000000  |
| N | -1.0490185 | -2.0977739 | 0.0000000  |
| N | 1.2494885  | -1.9817584 | 0.0000000  |
| N | 2.3412347  | 0.1404103  | 0.0000000  |
| N | 0.0000000  | 0.0000000  | 0.0000000  |
| O | -0.2459021 | 3.9085869  | 0.0000000  |
| O | 3.5078867  | -1.7413360 | 0.0000000  |
| O | -3.2619845 | -2.1672510 | 0.0000000  |
| C | 0.9018368  | 4.6971532  | 0.0000000  |
| C | 1.4279931  | 5.1129125  | -1.2069039 |
| C | 1.4279931  | 5.1129125  | 1.2069039  |
| C | 2.5232537  | 5.9625806  | -1.2009779 |
| H | 0.9825288  | 4.7708337  | -2.1327452 |
| C | 2.5232537  | 5.9625806  | 1.2009779  |
| H | 0.9825288  | 4.7708337  | 2.1327452  |
| C | 3.0725924  | 6.3867847  | 0.0000000  |
| H | 2.9481166  | 6.2936719  | -2.1410353 |
| H | 2.9481166  | 6.2936719  | 2.1410353  |
| H | 3.9285545  | 7.0507439  | 0.0000000  |
| C | 3.6169357  | -3.1295902 | 0.0000000  |
| C | 3.7139155  | -3.7931346 | 1.2069039  |
| C | 3.7139155  | -3.7931346 | -1.2069039 |
| C | 3.9021194  | -5.1664921 | 1.2009779  |
| H | 3.6403987  | -3.2363118 | 2.1327452  |
| C | 3.9021194  | -5.1664921 | -1.2009779 |
| H | 3.6403987  | -3.2363118 | -2.1327452 |
| C | 3.9948216  | -5.8543354 | 0.0000000  |
| H | 3.9764214  | -5.6999798 | 2.1410353  |
| H | 3.9764214  | -5.6999798 | -2.1410353 |
| H | 4.1418461  | -6.9275999 | 0.0000000  |
| C | -4.5187724 | -1.5675631 | 0.0000000  |
| C | -5.1419087 | -1.3197779 | 1.2069039  |
| C | -5.1419087 | -1.3197779 | -1.2069039 |
| C | -6.4253731 | -0.7960885 | 1.2009779  |
| H | -4.6229276 | -1.5345219 | 2.1327452  |
| C | -6.4253731 | -0.7960885 | -1.2009779 |
| H | -4.6229276 | -1.5345219 | -2.1327452 |
| C | -7.0674140 | -0.5324493 | 0.0000000  |
| H | -6.9245381 | -0.5936921 | 2.1410353  |
| H | -6.9245381 | -0.5936921 | -2.1410353 |
| H | -8.0704005 | -0.1231440 | 0.0000000  |

### Cartesian coordinates of molecule 3.

|    |            |            |            |
|----|------------|------------|------------|
| C  | 1.0517112  | 0.9192832  | 0.0000000  |
| C  | -0.5001002 | 2.5504421  | 0.0000000  |
| C  | -1.3219782 | 0.4511670  | 0.0000000  |
| C  | -1.9586975 | -1.7083205 | 0.0000000  |
| C  | 0.2702670  | -1.3704502 | 0.0000000  |
| C  | 2.4587977  | -0.8421215 | 0.0000000  |
| N  | -1.5616570 | 1.7486379  | 0.0000000  |
| N  | 0.7773053  | 2.2151959  | 0.0000000  |
| N  | -2.3070686 | -0.4344318 | 0.0000000  |
| N  | -0.7335364 | -2.2267536 | 0.0000000  |
| N  | 1.5297633  | -1.7807641 | 0.0000000  |
| N  | 2.2951933  | 0.4781157  | 0.0000000  |
| N  | -0.0000000 | 0.0000000  | 0.0000000  |
| Se | -0.9714075 | 4.3801555  | 0.0000000  |
| Se | 4.2790297  | -1.3488142 | 0.0000000  |
| Se | -3.3076222 | -3.0313413 | 0.0000000  |
| C  | 0.7751618  | 5.1533190  | 0.0000000  |
| C  | 1.3987296  | 5.4454870  | -1.2052236 |
| C  | 1.3987296  | 5.4454870  | 1.2052236  |
| C  | 2.6594126  | 6.0220598  | -1.2017976 |
| H  | 0.9029534  | 5.2138670  | -2.1399487 |
| C  | 2.6594126  | 6.0220598  | 1.2017976  |
| H  | 0.9029534  | 5.2138670  | 2.1399487  |
| C  | 3.2895145  | 6.3092193  | 0.0000000  |
| H  | 3.1511143  | 6.2444587  | -2.1415301 |
| H  | 3.1511143  | 6.2444587  | 2.1415301  |
| H  | 4.2758693  | 6.7582151  | 0.0000000  |
| C  | 4.0753243  | -3.2479693 | 0.0000000  |
| C  | 4.0165652  | -3.9340789 | 1.2052236  |
| C  | 4.0165652  | -3.9340789 | -1.2052236 |
| C  | 3.8855505  | -5.3141488 | 1.2017976  |
| H  | 4.0638646  | -3.3889141 | 2.1399487  |
| C  | 3.8855505  | -5.3141488 | -1.2017976 |
| H  | 4.0638646  | -3.3889141 | -2.1399487 |
| C  | 3.8191869  | -6.0034128 | 0.0000000  |
| H  | 3.8323027  | -5.8511744 | 2.1415301  |
| H  | 3.8323027  | -5.8511744 | -2.1415301 |
| H  | 3.7148513  | -7.0821190 | 0.0000000  |
| C  | -4.8504861 | -1.9053497 | 0.0000000  |
| C  | -5.4152948 | -1.5114081 | 1.2052236  |
| C  | -5.4152948 | -1.5114081 | -1.2052236 |
| C  | -6.5449631 | -0.7079110 | 1.2017976  |
| H  | -4.9668180 | -1.8249529 | 2.1399487  |
| C  | -6.5449631 | -0.7079110 | -1.2017976 |
| H  | -4.9668180 | -1.8249529 | -2.1399487 |
| C  | -7.1087014 | -0.3058065 | 0.0000000  |
| H  | -6.9834170 | -0.3932843 | 2.1415301  |
| H  | -6.9834170 | -0.3932843 | -2.1415301 |
| H  | -7.9907206 | 0.3239038  | 0.0000000  |

## Cartesian coordinates of molecule 4.

|    |            |            |            |
|----|------------|------------|------------|
| C  | 1.1795962  | -0.7483019 | -0.1368837 |
| C  | 2.3081074  | 1.2033786  | -0.1376090 |
| C  | 0.0582503  | 1.3957112  | -0.1368837 |
| C  | -2.1962102 | 1.3971904  | -0.1376090 |
| C  | -1.2378466 | -0.6474094 | -0.1368837 |
| C  | -0.1118973 | -2.6005690 | -0.1376090 |
| N  | 1.2363230  | 1.9928093  | -0.1406307 |
| N  | 2.3447425  | -0.1170887 | -0.1389554 |
| N  | -1.0709694 | 2.0891510  | -0.1389554 |
| N  | -2.3439850 | 0.0742824  | -0.1406307 |
| N  | -1.2737731 | -1.9720622 | -0.1389554 |
| N  | 1.1076620  | -2.0670917 | -0.1406307 |
| N  | -0.0000000 | -0.0000000 | -0.1325551 |
| Te | 4.1021996  | 2.2780199  | -0.1546961 |
| Te | -0.0782767 | -4.6916190 | -0.1546961 |
| Te | -4.0239229 | 2.4135991  | -0.1546961 |
| C  | 5.4074673  | 0.6332594  | -0.0531819 |
| C  | 5.4765155  | -0.2822188 | -1.0969725 |
| C  | 6.2222740  | 0.4823760  | 1.0626159  |
| C  | 6.3511762  | -1.3537404 | -1.0146209 |
| H  | 4.8409490  | -0.1668412 | -1.9659706 |
| C  | 7.1080626  | -0.5837127 | 1.1314828  |
| H  | 6.1596411  | 1.1875698  | 1.8832160  |
| C  | 7.1700187  | -1.5029363 | 0.0958142  |
| H  | 6.3945823  | -2.0735272 | -1.8237043 |
| H  | 7.7421969  | -0.6996792 | 2.0027827  |
| H  | 7.8563454  | -2.3396891 | 0.1541669  |
| C  | -2.1553149 | -4.9996338 | -0.0531819 |
| C  | -2.6933871 | -5.6298354 | 1.0626159  |
| C  | -2.9826664 | -4.6016921 | -1.0969725 |
| C  | -4.0595413 | -5.8639064 | 1.1314828  |
| H  | -2.0513549 | -5.9281905 | 1.8832160  |
| C  | -4.3479616 | -4.8234097 | -1.0146209 |
| H  | -2.5649633 | -4.1089642 | -1.9659706 |
| C  | -4.8865904 | -5.4579502 | 0.0958142  |
| H  | -4.4770384 | -6.3550996 | 2.0027827  |
| H  | -4.9930184 | -4.5011071 | -1.8237043 |
| H  | -5.9544028 | -5.6339502 | 0.1541669  |
| C  | -3.2521524 | 4.3663743  | -0.0531819 |
| C  | -3.5288869 | 5.1474594  | 1.0626159  |
| C  | -2.4938491 | 4.8839109  | -1.0969725 |
| C  | -3.0485212 | 6.4476191  | 1.1314828  |
| H  | -4.1082861 | 4.7406208  | 1.8832160  |
| C  | -2.0032145 | 6.1771501  | -1.0146209 |
| H  | -2.2759858 | 4.2758055  | -1.9659706 |
| C  | -2.2834283 | 6.9608865  | 0.0958142  |
| H  | -3.2651585 | 7.0547788  | 2.0027827  |
| H  | -1.4015639 | 6.5746343  | -1.8237043 |
| H  | -1.9019425 | 7.9736392  | 0.1541669  |
